# Supplementary material for: The Streptomyces scabiei Pathogenicity Factor Thaxtomin A Induces the Production of Phenolic Compounds in Potato Tubers
Source: MDPI journal article supplement (doi:10.3390/plants11233216), 2022-11-24
Supplement: s1 [file s1]

**Table S1. List of primers.**

| Gene                                                                                 | Primer sequence                                        | Reference |
|--------------------------------------------------------------------------------------|--------------------------------------------------------|-----------|
| Phenylalanine ammonia-lyase (PAL)                                                    | ACGGGTTGCCATCTAATCTGACA/<br>CGAGCAATAAGAAGCCATCGCAAT   | [57]      |
| Cinnamate 4-hydroxylase (C4H)                                                        | CCCAGTTTTTGGAAATTGGCTTCA/<br>GCCCCATTCTAAGCAAGAGAACATC |           |
| Hydroxycinnamoyl-Coenzyme A shikimate:<br>quinate hydroxycinnamoyl-transferase (HCT) | CCCGAATGCAGATACTGTTCTGA/<br>AGTGAGTCCTCGTGCCATACAAGT   | [58]      |
| 18S rRNA                                                                             | AATTACCCAATCCTGACACGGG/<br>TTGCCCTCCAATGGATCCTCGTTA    | [59]      |
| Adenine phosphoribosyltransferase 1-like (APRT)                                      | GAACCGGAGCAGGTGAAGAA/<br>GAAGCAATCCCAGCGATACG          |           |
